# Supplementary material for: Cholesterol-lowering activity of protocatechuic acid is mediated by increasing the excretion of bile acids and modulating gut microbiota and producing short-chain fatty acids
Source: Royal Society of Chemistry journal article supplement (doi:10.1039/d1fo02906a), 2021-01-01
Supplement: d1fo02906a1.pdf [file d1fo02906a1.pdf]

**Supplementary Table 1.** Fatty acid compositions of lard that used in animal diet.

| Fatty acid species | Contents (g/100g) |
|--------------------|-------------------|
| 14:0               | 2.4 ± 0.2         |
| 16:0               | 25.0 ± 2.1        |
| 18:0               | 15.1 ± 1.4        |
| Total SFA          | 42.4 ± 3.7        |
| 18:1 n-9           | 43.9 ± 4.3        |
| Total MUFA         | 43.9 ± 4.3        |
| 18:2 n-6           | 7.6 ± 0.7         |
| Total PUFA         | 7.6 ± 0.7         |

Abbreviations: MUFA, monounsaturated fatty acid; PUFA, polyunsaturated fatty acid; SFA, saturated fatty acid. n = 3.

**Supplementary Table 2.** Quantitative real-time PCR primer sequences.

| Gene   | Forward primer, 5' to 3'    | Reverse primer, 5' to 3'  |
|--------|-----------------------------|---------------------------|
| CYCLO  | CAAATGCTGGACCAAACACA        | CAGTCTTGGCGGTGCAGAT       |
| NPC1L1 | CCTGACCTTTATAGAACTCACCACAGA | GGGCCAAAATGCTCGTCAT       |
| ACAT2  | CCGAGATGCTTCGATTTGGA        | GTGCGGTAGTAGTTGGAGAAGGA   |
| MTP    | GTCAGGAAGCTGTGTCAGAATG      | CTCCTTTTTCTCTGGCTTTTCA    |
| ABCG5  | TGATTGGCAGCTATAATTTTGGG     | GTTGGGCTGCGATGGAAA        |
| ABCG8  | TGCTGGCCATCATAGGGAG         | TCCTGATTCATCTTGCCACC      |
| GAPDH  | GAACATCATCCCTGCATCCA        | CCAGTGAGCTTCCCGTTCA       |
| SREBP2 | GGACTTGGTCATGGGAACAGATG     | TGTAATCAATGGCCTTCCTCAGAAC |
| HMGCR  | CGAAGGGTTTGCAGTGATAAAGGA    | GCCATAGTCACATGAAGCTTCTGTA |
| LDLR   | GCCGGGACTGGTCAG ATG         | ACAGCCACCATTGTTGTCCA      |
| CYP7A1 | GGTAGTGTGCTGTTGTATATGGGTTA  | ACAGCCCAGGTATGGAATCAAC    |
